# Supplementary material for: Manganese Depletion Leads to Multisystem Changes in the Transcriptome of the Opportunistic Pathogen Streptococcus sanguinis
Source: Front Microbiol. 2020 Nov 5;11:592615. doi: 10.3389/fmicb.2020.592615 (PMC7674665; doi:10.3389/fmicb.2020.592615)
Supplement: Supplementary Table 3 — Primers used in this study. [file Table_3.XLSX]

## Sheet: Plasmids and Primers
Plasmid or primer	Description/Sequence	Source or Reference
rel mutagenesis primers
IFDC_F_New	CGAGCCACGATAACGCTC	This study
IFDC_Flank_R1	TTATTTCCTCCCGTTAAATAATAGATAAC	Cheng e al. (2018)
SSA_0250_F1	GCCGAATGTCTCTAGACTGTTAAGT	Xu et al. (2011)
SSA_0250_R3	AAATCATCTACGACCGAAATGG	Xu et al. (2011)
relP_F1	GCGACTGTCCTTAATCACT	This study
relP_IFDC_R1	TCTATTATTTAACGGGAGGAAATAAGATGATGAAGATTTTATTAGCTGAAG	This study
relP_IFDC_F2	ACGCGATGAGCGTTATCGTGGCTCGACAGTTCTCCTACTTTTCTAG	This study
relP_R2	GAAAGAAGATGCTGAAATTGATACC	This study
relP_R3	GTAGGAGAACTGTGATGATGAAGATTTTATTAGCTGAAGATG	This study
relP_F3	AATCTTCATCATCACAGTTCTCCTACTTTTCTAG	This study
relQ_F1	ACAAGTCCTTATCAACAGCT	This study
relQ_IFDC_R1	TCTATTATTTAACGGGAGGAAATAAATGACGGTGTGGGAAATAG	This study
relQ_IFDC_F2	ACGCGATGAGCGTTATCGTGGCTCGACACTTACCTTGTCATATCATTATTTTTTG	This study
relQ_R2	ACCATAATCAAGAGTTCCATCAAGT	This study
relQ_R3	ACAAGGTAAGTGTATGACGGTGTGGGAAATAG	This study
relQ_F3	CCCACACCGTCATACACTTACCTTGTCATATCATTATTTTTTG	This study
qRT-PCR primers
gapA_FWD	GCTTTCCGTCGTATCCAAAA	Rodriguez et al. (2011)
gapA_RVS	ACACCGTCAGTAGCCCAGTC	Rodriguez et al. (2011)
SSA_0074_qPCR_F1	TCAGTGGTTGTTCTCCAAGTG	This study
SSA_0074_qPCR_R1	AACGAGGTCCCTGTGTAAATG	This study
spxB_qPCR_F1	GCCCTAGTCTCCATGTTTATCG	This study
spxB_qPCR_R1	CCCACAACACCCAGAACTAAA	This study
eutQ_qPCR_F1	CCTTAGACGAAAGCCCAAGAT	This study
eutQ_qPCR_R1	TCAAGACGCCCTTCAATAACA	This study
dpr_qPCR_F1	CCGCTATCTGACAGGTCTTTAC	This study
dpr_qPCR_R1	CCTTGGCACCGACAAAGATA	This study
comEA_qPCR_F1	GGAGCTTCTGATTCTGCTAGTG	This study
comEA_qPCR_R1	TCTGTCCGATGCCTGAAATG	This study
sodA_qPCR_F1	GAATGTTAATGCTGCGCTTGA	This study
sodA_qPCR_R1	CTGACGGATATCAGCAGGAATAG	This study
arcT_qPCR_F1	CTGGATAGCGGAGTGGAATTTA	This study
arcT_qPCR_R1	CCTGCTCTTCTAGCTGGTTATAC	This study
nrdF_qPCR_F1	AGACTCAGACTGGAGGGTATC	This study
nrdF_qPCR_R1	GACCTGGATGACTGGAGAAAG	This study
PTS_EIIAB_qPCR_F1	GGTGAATTTGCTGCTGGTATTC	This study
PTS_EIIAB_qPCR_R1	GCATAGAGATCATCTGGTCCTTC	This study
pilB_qPCR_F1	ATGCAACCCTCCTCAGTAAAG	This study
pilB_qPCR_R1	AGGACCAGTCAGCAAGATAATG	This study
